# Supplementary material for: High-adhesion stretchable organic single-crystal photoelectric thin films
Source: Royal Society of Chemistry journal article supplement (doi:10.1039/d5nr03789a), 2025-12-12
Supplement: d5nr03789a1.pdf [file d5nr03789a1.pdf]

## Supporting Information

### High-adhesion Stretchable Organic Single-Crystal Photoelectric Thin Films

*Shao-Hua Wang<sup>1</sup>, Xiao-Xiao Lu<sup>1</sup>, Min Xu<sup>1</sup>, Meng-Na Yu<sup>2</sup>, Xue-Mei Dong<sup>1</sup>, Fa Zhang<sup>1</sup>, Yin-Xiang Li<sup>\*1</sup>, Ju-Qing Liu<sup>1</sup>*

<sup>1</sup>State Key Laboratory of Flexible Electronics (LoFE) and Institute of Advanced Materials (IAM), Nanjing Tech University (Nanjing Tech), 30 South Puzhu Road, Nanjing 211816, China.

<sup>2</sup> State Key Laboratory of Flexible Electronics (LoFE) & Institute of Advanced Materials (IAM), Jiangsu National Synergetic Innovation Center for Advanced Materials (SICAM), Nanjing University of Posts & Telecommunications, Nanjing 210023, China.

E-mail: [iamyxli@njtech.edu.cn](mailto:iamyxli@njtech.edu.cn), ORCID: 0000-0002-0606-7949.

Keywords: flexible photoelectronics, organic single crystals, molecular self-assembly, stretchable thin film.

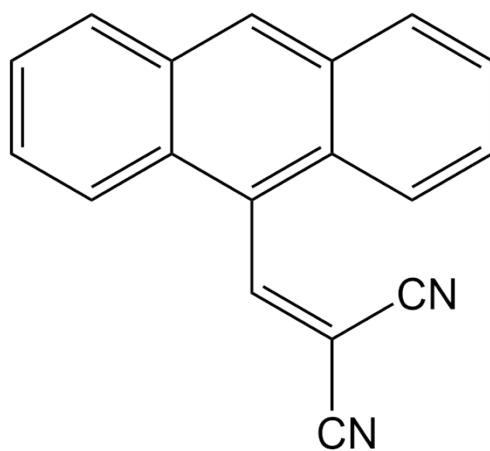

**Figure S1.** Molecular structure of 2-(Anthracen-9-ylmethylene)malononitrile (AMN).

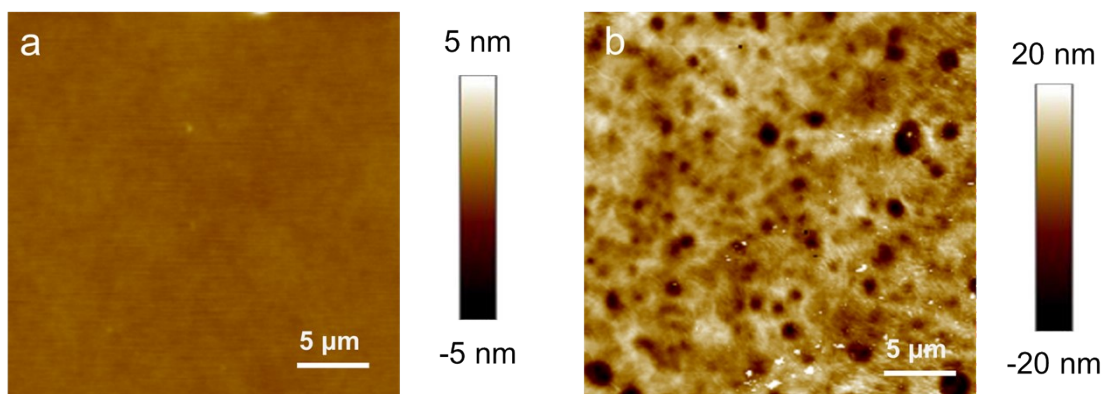

**Figure S2.** AFM images of the PDMS substrate (a) before and (b) after toluene etching.

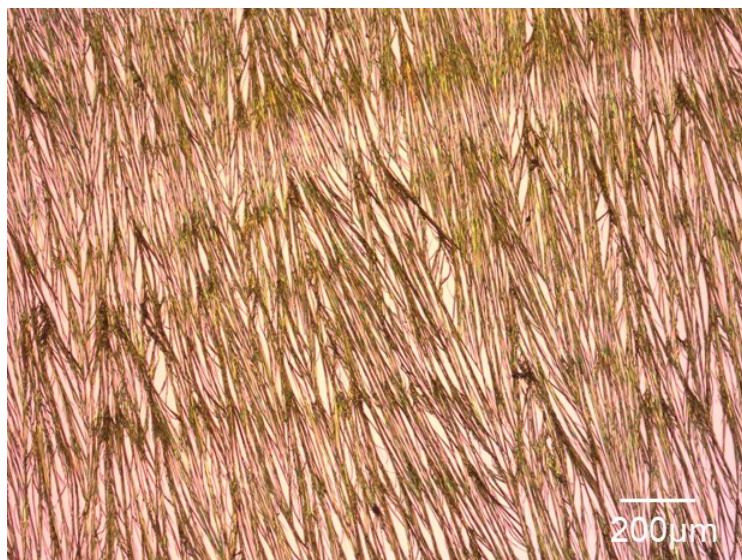

**Figure S3.** Optical microscope image of the ordered microwire arrays (OMAs) obtained by self-ssembling of AYM on fully cured PDMS substrate.

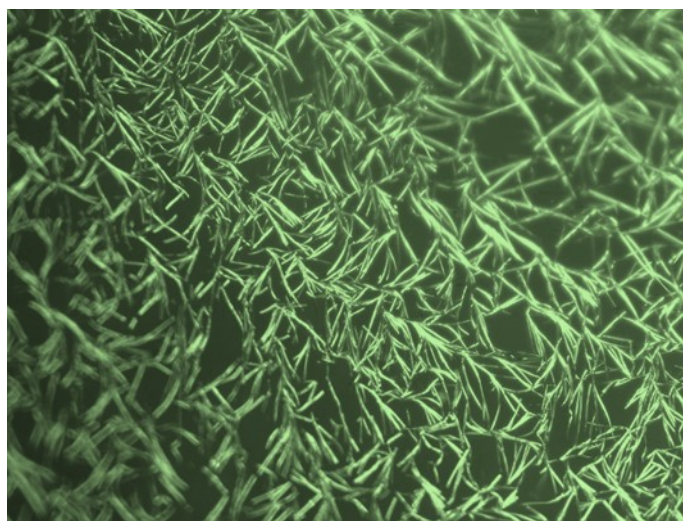

Figure S4. Optical microscope image of an AYM network that has been stretched by 20% and  
then restored to its original state

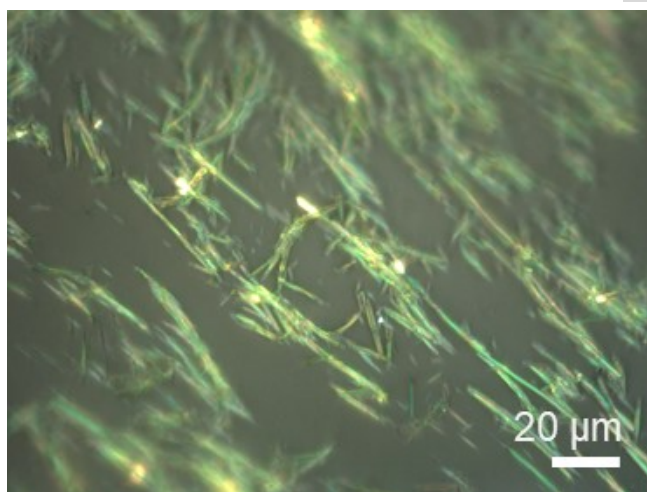

Figure S5. Optical microscope image of a ruptured AYM network after 40% tensile strains

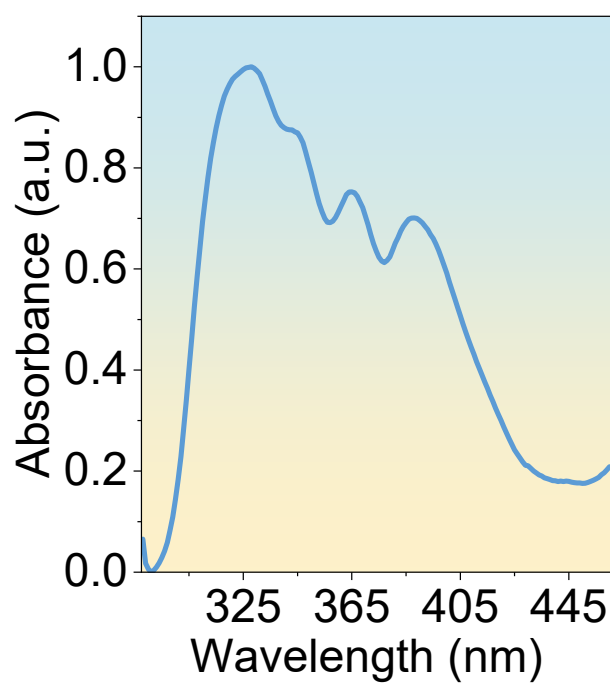

Figure S6. UV-Vis-NIR absorption spectrum of the AYM microwire network.

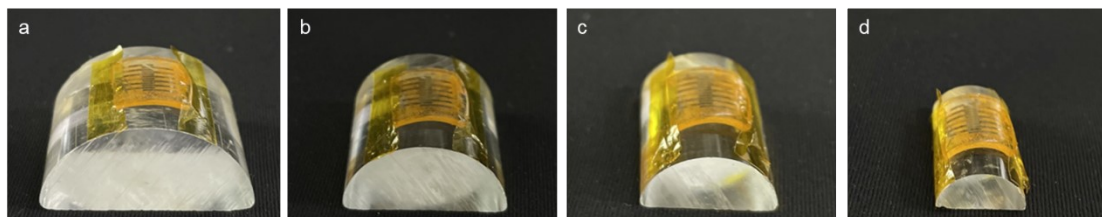

Figure S7. The backside of the devices was wrapped around the acrylic cylinders with different radii ( $r$ ). (a)  $r = 1.8$  cm; (b)  $r = 1.5$  cm; (c)  $r = 1$  cm; (d)  $r = 0.8$  cm.

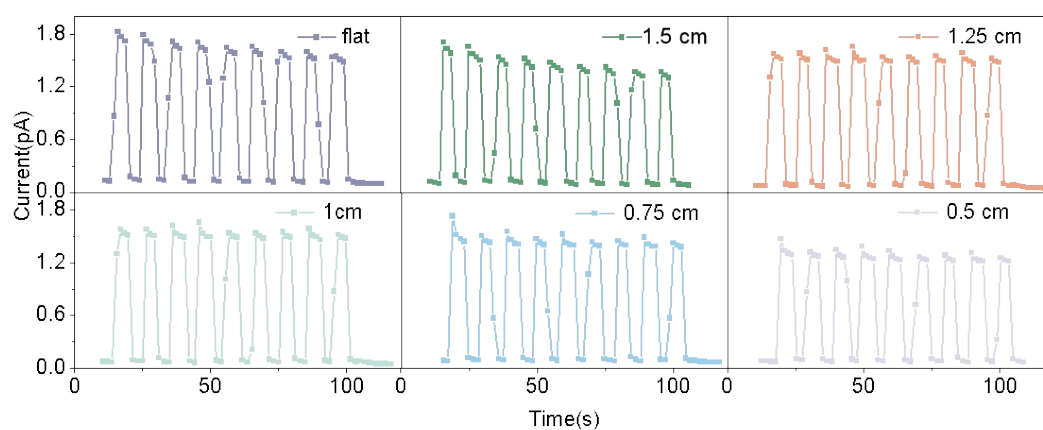

Figure S8. Photocurrent was measured over nine consistent post-pulse intervals at bending radii of 0, 1.5 cm, 1.25 cm, 1 cm, 0.75 cm, and 0.5 cm.
